# Supplementary material
Source: PubMed Central journal article supplement (PMC8035930)
Supplement: Supp_Table2.pdf [file Supp_Table2.pdf]

SUPPLEMENTARY TABLE S2. INDICATIONS REPORTED AS SUBINDICATION “OTHER” WITH THE RESPECTIVE NUMBER OF CELL AND TISSUE-ENGINEERED THERAPY TREATMENTS

| <i>Indication</i>                                                                                         | <i>Patients</i> |
|-----------------------------------------------------------------------------------------------------------|-----------------|
| Cardiovascular                                                                                            |                 |
| Atherosclerosis (coronary arteries)                                                                       | 196             |
| Dilated cardiomyopathy                                                                                    | 2               |
| Lymphedema                                                                                                | 3               |
| Musculoskeletal/rheumatological                                                                           |                 |
| Pump syndrome                                                                                             | 4               |
| Femoroacetabular impingement                                                                              | 1               |
| Fibromyalgia                                                                                              | 1               |
| Alopecia                                                                                                  | 2               |
| Calvarial bone defects                                                                                    | 2               |
| Intervertebral disc degeneration                                                                          | 101             |
| Osteoporosis                                                                                              | 7               |
| Periodontal tissue repair                                                                                 | 5               |
| Neurological                                                                                              |                 |
| Autism                                                                                                    | 3               |
| Cerebellar ataxia                                                                                         | 6               |
| Cerebellar syndrome                                                                                       | 5               |
| Cerebral atrophy                                                                                          | 4               |
| Cerebral palsy                                                                                            | 39              |
| Devic’s disease                                                                                           | 1               |
| Friedreich’s ataxia                                                                                       | 1               |
| Hypoplasia of the optic nerve                                                                             | 1               |
| Moya-moya disease                                                                                         | 1               |
| Muscular dystrophy (facioscapulohumeral muscular dystrophy, Duchenne, and limb girdle muscular dystrophy) | 50              |
| Myopathy                                                                                                  | 1               |
| Neuropathy of the optic nerves                                                                            | 4               |
| Spinal cord injury                                                                                        | 9               |
| Spinal muscular atrophy type I                                                                            | 3               |
| Stiff Person syndrome                                                                                     | 2               |
| Stroke                                                                                                    | 13              |
| Miscellaneous                                                                                             |                 |
| Adrenoleukodystrophy                                                                                      | 1               |
| Autoimmune disease                                                                                        | 4               |
| Autosomal dominant polycystic kidney disease                                                              | 3               |
| BM aplasia                                                                                                | 5               |
| Chronic obstructive pulmonary disease                                                                     | 8               |
| Deceased donor organ transplantation                                                                      | 6               |
| Endometrial hypoplasia                                                                                    | 5               |
| Epstein–Barr virus                                                                                        | 1               |
| Fecal incontinence                                                                                        | 1               |
| Glaucoma                                                                                                  | 4               |
| Glioblastoma multiforme                                                                                   | 1               |
| Histiocytosis X                                                                                           | 1               |
| HIV Infection                                                                                             | 5               |
| Idiopathic pulmonary fibrosis                                                                             | 4               |
| Infection                                                                                                 | 6               |
| Kidney disease                                                                                            | 2               |
| Necrobiotic xanthogranuloma                                                                               | 1               |
| Premature ovarian failure                                                                                 | 9               |
| Primary immune deficiency                                                                                 | 1               |
| Radiation-induced xerostomia                                                                              | 10              |
| Relapsing cytomegalovirus-reactivation                                                                    | 1               |
| Retinitis pigmentosa                                                                                      | 1               |
| Sickle cell disease                                                                                       | 2               |
| Skin—aging                                                                                                | 328             |
| Skin—dystrophic epidermolysis bullosa                                                                     | 5               |
| Skin—facial deformities                                                                                   | 32              |
| Skin—psoriasis                                                                                            | 6               |

SUPPLEMENTARY TABLE S2. (CONTINUED)

| <i>Indication</i>                                                        | <i>Patients</i> |
|--------------------------------------------------------------------------|-----------------|
| Skin—Vitiligo                                                            | 503             |
| Skin—recessive dystrophic epidermolysis bullosa                          | 1               |
| Skin—vulgar psoriasis                                                    | 1               |
| Solid organ transplantation                                              | 4               |
| Systemic lupus                                                           | 3               |
| Ultra filtration failure in peritoneal dialysis                          | 9               |
| Vaginal mucosa reconstruction in Mayer-Rokitansky-Kuster-Hauser Syndrome | 6               |
| Vasculitis                                                               | 1               |

(continued)
