# Supplementary material
Source: PubMed Central journal article supplement (PMC8035930)
Supplement: Supp_Table3.pdf [file Supp_Table3.pdf]

SUPPLEMENTARY TABLE S3. (A) CELL TYPE AND SOURCES REPORTED AS “OTHER” WITH RESPECTIVE INDICATIONS THEY WERE USED TO TREAT AND THE NUMBER OF PATIENTS TREATED; (B) CELL TYPE AND SOURCE OF TREATMENTS WITH COMBINED CELL TYPES WITH RESPECTIVE INDICATIONS AND NUMBER OF PATIENTS TREATED

| <i>Cell type and source</i>                                                      |                                                                                                      | <i>Indication</i>                         |                                               | <i>Patients</i> |
|----------------------------------------------------------------------------------|------------------------------------------------------------------------------------------------------|-------------------------------------------|-----------------------------------------------|-----------------|
| <b>(A)</b>                                                                       |                                                                                                      |                                           |                                               |                 |
| Cardiac stem cells                                                               | Cardiovascular                                                                                       | Heart failure                             |                                               | 1               |
| Cardiovascular progenitors derived from human embryonic stem cells               | Cardiovascular                                                                                       | Heart failure                             |                                               | 4               |
| Endothelial cells                                                                | Miscellaneous                                                                                        | Cornea repair                             |                                               | 11              |
| Gingival fibroblasts                                                             | Musculoskeletal/rheumatological                                                                      | Periodontal tissue repair                 |                                               | 5               |
| Limbal epithelial stem cells                                                     | Miscellaneous                                                                                        | Cornea repair                             |                                               | 25              |
| Melanocytes                                                                      | Miscellaneous                                                                                        | Skin—Vitiligo                             |                                               | 2               |
| Muscle cells                                                                     | Musculoskeletal/rheumatological                                                                      | Tendon/ligament                           |                                               | 20              |
|                                                                                  | Neurological                                                                                         | Facioscapulohumeral muscular dystrophy    |                                               | 11              |
| Neural crest stem cells from gingival                                            | Musculoskeletal/rheumatological                                                                      | Bone repair (maxillofacial)               |                                               | 4               |
| Neural crest stem cells derived from hair follicle                               | Musculoskeletal/rheumatological                                                                      | Intervertebral disc degeneration          |                                               | 5               |
|                                                                                  | Neurological                                                                                         | Multiple Sclerosis                        |                                               | 4               |
|                                                                                  |                                                                                                      | Peripheral Nerve Regeneration from Trauma |                                               | 8               |
|                                                                                  |                                                                                                      | Spinal Cord Injury                        |                                               | 6               |
| Neural stem cells from central nervous system tissue of spontaneous miscarriages | Miscellaneous                                                                                        | Glaucoma                                  |                                               | 4               |
|                                                                                  | Neurological                                                                                         | Amyotrophic lateral sclerosis             |                                               | 18              |
| Pancreatic Islet cells                                                           | Miscellaneous                                                                                        | Diabetes                                  |                                               | 15              |
| <i>Primary cell type</i>                                                         | <i>Additional cell types and sources</i>                                                             | <i>Indication</i>                         |                                               | <i>Patients</i> |
| <b>(B)</b>                                                                       |                                                                                                      |                                           |                                               |                 |
| BM-MSCs                                                                          | Osteoprogenitor cells derived and from periosteum and Endothelia cells derived from peripheral blood | Musculoskeletal/rheumatological           | Bone repair (orthopedics)                     | 38              |
| Chondrocytes                                                                     | BM-MSCs                                                                                              | Musculoskeletal/rheumatological           | Cartilage repair (maxillofacial)              | 3               |
| Muscle cells                                                                     | Allogenic Fat MSCs                                                                                   | Neurological                              | Facioscapulohumeral muscular dystrophy (FSHD) | 11              |
| Keratinocytes                                                                    | Melanocytes                                                                                          | Miscellaneous                             | Skin—Vitiligo                                 | 501             |
|                                                                                  | Allogenic Fibroblasts                                                                                | Miscellaneous                             | Skin reconstruction—burns                     | 2               |
|                                                                                  | Fibroblasts                                                                                          |                                           |                                               | 8               |
|                                                                                  | Allogenic Limbal cells                                                                               | Miscellaneous                             | Cornea repair                                 | 3               |

BM, bone marrow; MSC, mesenchymal stromal/stem cells.
