# Supplementary material
Source: PubMed Central journal article supplement (PMC8035930)
Supplement: Supp_Table4.pdf [file Supp_Table4.pdf]

SUPPLEMENTARY TABLE S4. NUMBER OF REPORTED CELL AND TISSUE-ENGINEERED THERAPY TREATMENTS IN EUROPE IN 2017 AND [2016] SORTED BY PROCESSING MODE

| Indication                                | Cell processing |             |              |            |             |           |            |        |              |                   | External facility |            |
|-------------------------------------------|-----------------|-------------|--------------|------------|-------------|-----------|------------|--------|--------------|-------------------|-------------------|------------|
|                                           | Nonexp.         | Expanded    | Untransduced | Transduced | Unsorted    | Sorted    | Automated  | Manual | Own facility | External facility |                   |            |
| Cardiovascular                            |                 |             |              |            |             |           |            |        |              |                   |                   |            |
| Peripheral artery disease                 | 6 [13]          |             | 6 [13]       |            | 6 [13]      |           | 6 [3]      |        | 0 [10]       |                   | 6 [13]            |            |
| Cardiomyopathy                            | 3 [16]          | 1 [0]       | 4 [16]       |            | 3 [16]      |           | 0 [6]      |        | 4 [10]       |                   | 3 [16]            | 1 [0]      |
| Heart failure                             | 10 [36]         | 5 [80]      | 15 [116]     |            | 10 [87]     | 5 [29]    | 0 [104]    |        | 15 [12]      |                   | 11 [116]          | 4 [0]      |
| Myocardial ischemia                       | 9 [2]           | 54 [0]      | 63 [2]       |            | 63 [2]      |           | 56 [0]     |        | 7 [2]        |                   | 63 [2]            |            |
| Decubitus+leg ulcers                      | 10 [62]         | 0 [17]      | 10 [79]      |            | 10 [79]     |           |            |        | 10 [79]      |                   | 10 [79]           |            |
| Other                                     | 5 [196]         |             | 5 [196]      |            | 5 [0]       | 0 [196]   | 2 [196]    |        | 3 [0]        |                   | 5 [98]            | 0 [98]     |
| Musculoskeletal/rheumatological           |                 |             |              |            |             |           |            |        |              |                   |                   |            |
| Bone repair (maxillofacial)               | 0 [4]           | 1 [9]       | 1 [13]       |            | 1 [13]      |           | 1 [4]      |        | 0 [9]        |                   | 1 [13]            |            |
| Bone repair (orthopedics)                 | 6 [13]          | 9 [55]      | 15 [68]      |            | 8 [66]      | 7 [2]     | 8 [7]      |        | 7 [61]       |                   | 13 [64]           | 2 [4]      |
| Osteogenesis imperfecta                   |                 | 2 [0]       | 2 [0]        |            | 2           |           |            |        | 2 [0]        |                   |                   | 2 [0]      |
| Cartilage repair (maxillofacial)          | 0 [3]           | 0 [32]      | 0 [35]       |            | 0 [35]      |           |            |        | 0 [35]       |                   | 0 [35]            |            |
| Cartilage repair (orthopedics)            | 638 [36]        | 474 [238]   | 1112 [274]   |            | 891 [266]   | 221 [8]   | 776 [1]    |        | 336 [273]    |                   | 821 [114]         | 291 [160]  |
| Muscle repair                             | 12 [5]          | 0 [24]      | 12 [29]      |            | 12 [29]     |           | 12 [5]     |        | 0 [24]       |                   | 12 [29]           |            |
| Tendon/ligament                           | 36 [17]         | 0 [20]      | 36 [37]      |            | 36 [37]     |           | 0 [20]     |        | 36 [17]      |                   | 36 [37]           |            |
| Reconstructive surgery/tissue enhancement | 0 [28]          | 11 [20]     | 11 [48]      |            | 11 [48]     |           | 0 [10]     |        | 11 [38]      |                   | 11 [34]           | 0 [14]     |
| Scleroderma                               | 2 [0]           | 6 [7]       | 8 [7]        |            | 8 [6]       |           | 2 [2]      |        | 6 [5]        |                   | 8 [7]             |            |
| Arthritis                                 | 2 [109]         | 20 [440]    | 22 [549]     |            | 14 [549]    | 8 [0]     | 2 [232]    |        | 20 [317]     |                   | 14 [347]          | 8 [202]    |
| Other                                     | 0 [8]           | 32 [83]     | 32 [91]      |            | 7 [91]      | 25 [0]    | 25 [36]    |        | 7 [55]       |                   | 7 [57]            | 25 [34]    |
| Neurological                              |                 |             |              |            |             |           |            |        |              |                   |                   |            |
| Multiple Sclerosis                        | 34 [28]         | 10 [35]     | 44 [63]      |            | 44 [63]     |           | 13 [10]    |        | 31 [53]      |                   | 20 [46]           | 24 [17]    |
| Amyotrophic lateral sclerosis             |                 | 52 [20]     | 52 [20]      |            | 52 [20]     |           |            |        | 52 [20]      |                   | 46 [20]           | 6 [0]      |
| Parkinson's                               | 0 [1]           |             | 0 [1]        |            | 0 [1]       |           |            |        | 0 [1]        |                   | 0 [1]             |            |
| Peripheral nerve regeneration (trauma)    | 0 [1]           | 0 [8]       | 0 [9]        |            | 0 [8]       |           | 0 [1]      |        | 0 [9]        |                   | 0 [9]             |            |
| Other                                     | 10 [45]         | 69 [19]     | 79 [64]      |            | 79 [24]     | 0 [40]    | 10 [5]     |        | 69 [59]      |                   | 10 [64]           | 69 [0]     |
| Gastrointestinal                          |                 |             |              |            |             |           |            |        |              |                   |                   |            |
| Crohn's disease                           |                 | 0 [17]      | 0 [17]       |            | 0 [17]      |           |            |        | 0 [17]       |                   | 0 [17]            |            |
| Liver insufficiency                       |                 | 2 [16]      | 2 [16]       |            | 2 [11]      |           |            |        | 2 [16]       |                   | 2 [11]            | 0 [5]      |
| Hematology/oncology                       |                 |             |              |            |             |           |            |        |              |                   |                   |            |
| Hematological malignancies                | 810 [35]        | 908 [1549]  | 1638 [1533]  |            | 1504 [1467] | 214 [117] | 889 [29]   |        | 829 [1555]   |                   | 1692 [174]        | 26 [1410]  |
| Solid tumor                               | 20 [53]         | 70 [64]     | 75 [106]     |            | 80 [91]     | 10 [26]   | 9 [1]      |        | 81 [116]     |                   | 79 [63]           | 11 [54]    |
| Miscellaneous                             |                 |             |              |            |             |           |            |        |              |                   |                   |            |
| Skin reconstruction—burns                 | 1 [312]         | 43 [22]     | 44 [334]     |            | 44 [334]    |           |            |        | 44 [334]     |                   | 44 [320]          | 0 [14]     |
| Cornea repair                             |                 | 19 [20]     | 19 [20]      |            | 19 [20]     |           |            |        | 19 [20]      |                   | 16 [20]           | 3 [0]      |
| Diabetes                                  | 3 [0]           | 18 [14]     | 21 [14]      |            | 12 [14]     | 9 [0]     | 9 [3]      |        | 12 [11]      |                   | 21 [14]           |            |
| Other                                     | 248 [271]       | 64 [398]    | 312 [669]    |            | 308 [666]   | 4 [3]     | 11 [1]     |        | 301 [668]    |                   | 311 [669]         | 1 [0]      |
| Total                                     | 1865 [1294]     | 1870 [3207] | 3640 [4439]  |            | 3231 [4072] | 504 [429] | 1831 [675] |        | 1904 [3826]  |                   | 3262 [2489]       | 473 [2012] |

nonexp., nonexpanded.
