# Supplementary material
Source: PubMed Central journal article supplement (PMC8035930)
Supplement: Supp_Table5.pdf [file Supp_Table5.pdf]

SUPPLEMENTARY TABLE S5. NUMBER OF REPORTED CELL AND TISSUE-ENGINEERED THERAPY TREATMENTS IN EUROPE IN 2017 AND [2016] SORTED BY DELIVERY MODE

| <i>Indications</i>                        | <i>Cell delivery mode</i> |                   |                |                          |
|-------------------------------------------|---------------------------|-------------------|----------------|--------------------------|
|                                           | <i>i.v. or i.a</i>        | <i>Intraorgan</i> |                |                          |
|                                           |                           | <i>Suspension</i> | <i>Gel</i>     | <i>Membrane/scaffold</i> |
| <b>Cardiovascular</b>                     |                           |                   |                |                          |
| Peripheral artery disease                 | 4 [7]                     | 2 [6]             |                |                          |
| Cardiomyopathy                            | 3 [2]                     | 1 [14]            |                |                          |
| Heart failure                             | 10 [11]                   | 4 [102]           |                | 1 [3]                    |
| Myocardial ischemia                       | 2 [2]                     | 54 [0]            |                | 7 [0]                    |
| Decubitus+leg ulcers                      |                           |                   | [17]           | 10 [62]                  |
| Other                                     | 2 [0]                     | 3 [102]           |                | [94]                     |
| <b>Musculoskeletal/rheumatological</b>    |                           |                   |                |                          |
| Bone repair (maxillofacial)               |                           | 1 [2]             | 0 [3]          | 0 [8]                    |
| Bone repair (orthopedics)                 |                           | 8 [12]            |                | 7 [56]                   |
| Osteogenesis imperfecta                   | 2 [0]                     |                   |                |                          |
| Cartilage repair (maxillofacial)          |                           | [35]              |                |                          |
| Cartilage repair (orthopedics)            | 26 [37]                   | 278 [43]          | 15 [10]        | 793 [184]                |
| Muscle repair                             |                           | 3 [24]            | 9 [5]          |                          |
| Tendon/ligament                           | 10 [20]                   | 26 [17]           |                |                          |
| Reconstructive surgery/tissue enhancement |                           | 11 [44]           |                | 0 [4]                    |
| Scleroderma                               | 7 [7]                     | 1 [0]             |                |                          |
| Arthritis                                 | 2 [10]                    | 20 [539]          |                |                          |
| Other                                     | 5 [2]                     | 27 [87]           |                | 0 [2]                    |
| <b>Neurological</b>                       |                           |                   |                |                          |
| Multiple sclerosis                        | 41 [61]                   | 3 [2]             |                |                          |
| Amyotrophic lateral sclerosis             | 28 [19]                   | 24 [0]            |                | 0 [1]                    |
| Parkinson's                               |                           | 0 [1]             |                |                          |
| Peripheral nerve regeneration (trauma)    |                           | 0 [9]             |                |                          |
| Other                                     | 10 [5]                    | 69 [59]           |                |                          |
| <b>Gastrointestinal</b>                   |                           |                   |                |                          |
| Crohn's disease                           |                           | 0 [17]            |                |                          |
| Liver insufficiency                       | 0 [13]                    | 2 [3]             |                |                          |
| <b>Hematology/oncology</b>                |                           |                   |                |                          |
| Hematological malignancies                | 1710 [1581]               | 8 [3]             |                |                          |
| Solid tumor                               | 80 [69]                   | 10 [48]           |                |                          |
| <b>Miscellaneous</b>                      |                           |                   |                |                          |
| Skin reconstruction—burns                 |                           | 7 [322]           | 0 [6]          | 37 [6]                   |
| Cornea repair                             |                           |                   |                | 19 [20]                  |
| Diabetes                                  | 18 [14]                   | 3 [0]             |                |                          |
| Other                                     | 21 [43]                   | 291 [595]         | 0 [20]         | 0 [11]                   |
| <b>Total</b>                              | <b>1981 [1903]</b>        | <b>856 [2086]</b> | <b>24 [61]</b> | <b>874 [451]</b>         |

i.a., intra-arterial; i.v., intravenous.
