# Supplementary material
Source: PubMed Central journal article supplement (PMC8035930)
Supplement: Supp_Table6.pdf [file Supp_Table6.pdf]

SUPPLEMENTARY TABLE S6. NUMBER OF REPORTED CELL AND TISSUE-ENGINEERED THERAPY TREATMENTS IN EUROPE IN 2017 AND [2016] SORTED BY TYPE OF CLINICAL PROCEDURE

| <i>Indications</i>                        | <i>Clinical procedure</i> |                   |                        |
|-------------------------------------------|---------------------------|-------------------|------------------------|
|                                           | <i>Clinical trial</i>     | <i>Case study</i> | <i>Routine therapy</i> |
| Cardiovascular                            |                           |                   |                        |
| Peripheral artery disease                 | 0 [10]                    | 2 [0]             | 4 [3]                  |
| Cardiomyopathy                            | 4 [15]                    |                   | 0 [1]                  |
| Heart failure                             | 15 [116]                  |                   |                        |
| Myocardial ischemia                       | 63 [2]                    |                   |                        |
| Decubitus+leg ulcers                      | 0 [17]                    | 10 [62]           |                        |
| Other                                     | 5 [196]                   |                   |                        |
| Musculoskeletal/rheumatological           |                           |                   |                        |
| Bone repair (maxillofacial)               | 0 [3]                     | 0 [10]            | 1 [0]                  |
| Bone repair (orthopedics)                 | 9 [58]                    | 6 [7]             | 0 [3]                  |
| Osteogenesis imperfecta                   | 2 [0]                     |                   |                        |
| Cartilage repair (maxillofacial)          | 0 [23]                    | 0 [12]            |                        |
| Cartilage repair (orthopedics)            | 227 [16]                  | 40 [39]           | 845 [219]              |
| Muscle repair                             | 12 [29]                   |                   |                        |
| Tendon/ligament                           | 36 [4]                    |                   | 0 [33]                 |
| Reconstructive surgery/tissue enhancement | 3 [7]                     | 1 [17]            | 7 [24]                 |
| Scleroderma                               | 6 [7]                     | 1 [0]             | 1 [0]                  |
| Arthritis                                 | 20 [82]                   | 0 [20]            | 2 [447]                |
| Other                                     | 7 [16]                    | 0 [30]            | 25 [45]                |
| Neurological                              |                           |                   |                        |
| Multiple sclerosis                        | 29 [38]                   | 4 [19]            | 11 [6]                 |
| Amyotrophic lateral sclerosis             | 46 [18]                   | 6 [1]             | 0 [1]                  |
| Parkinson's                               | 0 [1]                     |                   |                        |
| Peripheral nerve regeneration (trauma)    | 0 [1]                     | 0 [8]             |                        |
| Other                                     | 48 [57]                   | 30 [6]            | 1 [1]                  |
| Gastrointestinal                          |                           |                   |                        |
| Crohn's disease                           | 0 [15]                    | 0 [2]             |                        |
| Liver insufficiency                       | 2 [8]                     | 0 [8]             |                        |
| Hematology/oncology                       |                           |                   |                        |
| Hematological malignancies                | 169 [146]                 | 37 [67]           | 1512 [1371]            |
| Solid tumor                               | 86 [90]                   | 0 [24]            | 4 [3]                  |
| Miscellaneous                             |                           |                   |                        |
| Skin reconstruction—burns                 | 1 [10]                    | 0 [1]             | 43 [323]               |
| Cornea repair                             | 16 [9]                    | 3 [11]            |                        |
| Diabetes                                  | 21 [6]                    | 0 [8]             |                        |
| Other                                     | 13 [84]                   | 0 [19]            | 299 [566]              |
| Total                                     | 840 [1084]                | 140 [371]         | 2755 [3046]            |
